# Supplementary material
Source: PubMed Central journal article supplement (PMC2895374)
Supplement: mmc1.pdf [file mmc1.pdf]

Biophysical Journal, Volume 99

**Supporting Material**

**Driving Forces for Transmembrane  $\alpha$ -helix Oligomerization**

Alexander J. Sodt and Teresa Head-Gordon

|         | ALA    | ARG   | ASN   | ASP   | CYS   |  |
|---------|--------|-------|-------|-------|-------|--|
| ALA     | 95.7   | 9     | 27.5  | 18.3  | 17.5  |  |
| ARG     | 9      | 1.5   | 1     | 3.7   | 1     |  |
| ASN     | 27.5   | 1     | 5     | 5.5   | 4     |  |
| ASP     | 18.3   | 3.7   | 5.5   | 0     | 0     |  |
| CYS     | 17.5   | 1     | 4     | 0     | 0     |  |
| GLU     | 14.5   | 3     | 6.5   | 2.5   | 2     |  |
| GLN     | 16     | 3     | 3     | 1     | 6     |  |
| GLY     | 201.7  | 6.7   | 17    | 12    | 15.3  |  |
| HIS     | 10     | 2     | 1     | 3     | 1     |  |
| ILE     | 131.3  | 5     | 23.2  | 13.5  | 17.2  |  |
| LEU     | 233    | 14.5  | 15.5  | 10.5  | 18.8  |  |
| LYS     | 3      | 0     | 3     | 1     | 0     |  |
| MET     | 55.2   | 8     | 1.5   | 4.5   | 11    |  |
| PHE     | 95.7   | 8.3   | 14    | 8     | 9.5   |  |
| PRO     | 32.2   | 3     | 10    | 6     | 4     |  |
| SER     | 83.2   | 3     | 15    | 9     | 8     |  |
| THR     | 100.8  | 7     | 15    | 12    | 6.2   |  |
| TRP     | 36.7   | 1     | 5     | 3     | 4     |  |
| TYR     | 41     | 8.3   | 6.5   | 2     | 4     |  |
| VAL     | 175.1  | 7     | 13.7  | 10    | 15.3  |  |
| LIP     | 1000.8 | 28.2  | 108   | 52.7  | 110.2 |  |
| SURFACE | 803.3  | 281.3 | 203.5 | 109.2 | 73.5  |  |

  

|         | GLU  | GLN   | GLY   | HIS  | ILE    |  |
|---------|------|-------|-------|------|--------|--|
| ALA     | 14.5 | 16    | 201.7 | 10   | 131.3  |  |
| ARG     | 3    | 3     | 6.7   | 2    | 5      |  |
| ASN     | 6.5  | 3     | 17    | 1    | 23.2   |  |
| ASP     | 2.5  | 1     | 12    | 3    | 13.5   |  |
| CYS     | 2    | 6     | 15.3  | 1    | 17.2   |  |
| GLU     | 1    | 2     | 11    | 1    | 13     |  |
| GLN     | 2    | 2     | 22.5  | 1    | 7      |  |
| GLY     | 11   | 22.5  | 86    | 11.3 | 106.8  |  |
| HIS     | 1    | 1     | 11.3  | 2    | 8      |  |
| ILE     | 13   | 7     | 106.8 | 8    | 64.7   |  |
| LEU     | 17.7 | 11    | 154.7 | 4    | 103.7  |  |
| LYS     | 3    | 0     | 4.5   | 1    | 5.4    |  |
| MET     | 3    | 5.5   | 31.2  | 3    | 27.7   |  |
| PHE     | 6    | 7     | 90.8  | 8    | 70.4   |  |
| PRO     | 3.5  | 3     | 48    | 0    | 23.2   |  |
| SER     | 6.3  | 12.5  | 96    | 3    | 64.5   |  |
| THR     | 9    | 4     | 61.7  | 6.5  | 68.2   |  |
| TRP     | 2    | 2     | 31    | 1.5  | 14.5   |  |
| TYR     | 3    | 4     | 29.7  | 4    | 14.7   |  |
| VAL     | 10.5 | 10    | 137.4 | 8    | 109.2  |  |
| LIP     | 52.7 | 83.8  | 691.6 | 50.5 | 1148.7 |  |
| SURFACE | 114  | 160.3 | 676.8 | 33.2 | 917.9  |  |

|         | LEU    | LYS   | MET   | PHE   | PRO   |  |
|---------|--------|-------|-------|-------|-------|--|
| ALA     | 233    | 3     | 55.2  | 95.7  | 32.2  |  |
| ARG     | 14.5   | 0     | 8     | 8.3   | 3     |  |
| ASN     | 15.5   | 3     | 1.5   | 14    | 10    |  |
| ASP     | 10.5   | 1     | 4.5   | 8     | 6     |  |
| CYS     | 18.8   | 0     | 11    | 9.5   | 4     |  |
| GLU     | 17.7   | 3     | 3     | 6     | 3.5   |  |
| GLN     | 11     | 0     | 5.5   | 7     | 3     |  |
| GLY     | 154.7  | 4.5   | 31.2  | 90.8  | 48    |  |
| HIS     | 4      | 1     | 3     | 8     | 0     |  |
| ILE     | 103.7  | 5.4   | 27.7  | 70.4  | 23.2  |  |
| LEU     | 114.5  | 6.2   | 54.3  | 114.5 | 28    |  |
| LYS     | 6.2    | 0     | 1.5   | 1     | 3.7   |  |
| MET     | 54.3   | 1.5   | 8.5   | 35    | 7.5   |  |
| PHE     | 114.5  | 1     | 35    | 20    | 16.2  |  |
| PRO     | 28     | 3.7   | 7.5   | 16.2  | 4.3   |  |
| SER     | 59     | 3.5   | 21.3  | 38    | 15.5  |  |
| THR     | 80.5   | 2     | 28.5  | 43.2  | 20.3  |  |
| TRP     | 33.7   | 0     | 8     | 11.5  | 9     |  |
| TYR     | 35.7   | 1     | 15.7  | 14    | 10    |  |
| VAL     | 153.9  | 8.7   | 41.2  | 46.8  | 25.6  |  |
| LIP     | 1936.8 | 51.5  | 325.6 | 847.5 | 182.8 |  |
| SURFACE | 1340.4 | 181.8 | 330   | 732   | 251.4 |  |

  

|         | SER   | THR   | TRP   | TYR   | VAL    |  |
|---------|-------|-------|-------|-------|--------|--|
| ALA     | 83.2  | 100.8 | 36.7  | 41    | 175.1  |  |
| ARG     | 3     | 7     | 1     | 8.3   | 7      |  |
| ASN     | 15    | 15    | 5     | 6.5   | 13.7   |  |
| ASP     | 9     | 12    | 3     | 2     | 10     |  |
| CYS     | 8     | 6.2   | 4     | 4     | 15.3   |  |
| GLU     | 6.3   | 9     | 2     | 3     | 10.5   |  |
| GLN     | 12.5  | 4     | 2     | 4     | 10     |  |
| GLY     | 96    | 61.7  | 31    | 29.7  | 137.4  |  |
| HIS     | 3     | 6.5   | 1.5   | 4     | 8      |  |
| ILE     | 64.5  | 68.2  | 14.5  | 14.7  | 109.2  |  |
| LEU     | 59    | 80.5  | 33.7  | 35.7  | 153.9  |  |
| LYS     | 3.5   | 2     | 0     | 1     | 8.7    |  |
| MET     | 21.3  | 28.5  | 8     | 15.7  | 41.2   |  |
| PHE     | 38    | 43.2  | 11.5  | 14    | 46.8   |  |
| PRO     | 15.5  | 20.3  | 9     | 10    | 25.6   |  |
| SER     | 18.5  | 40.2  | 10    | 19    | 67.8   |  |
| THR     | 40.2  | 9.5   | 14    | 17.7  | 67     |  |
| TRP     | 10    | 14    | 2     | 7.3   | 17     |  |
| TYR     | 19    | 17.7  | 7.3   | 5     | 35.2   |  |
| VAL     | 67.8  | 67    | 17    | 35.2  | 57     |  |
| LIP     | 318   | 449.6 | 273.2 | 249.2 | 1094.2 |  |
| SURFACE | 393.5 | 385   | 355.7 | 450.8 | 865.2  |  |

Table S1: The native contact distribution for the 20 amino acids, lipid, and surface contacts.

|         | ALA    | ARG   | ASN   | ASP  | CYS   |
|---------|--------|-------|-------|------|-------|
| ALA     | 92.6   | 10.2  | 26.2  | 12.4 | 14.2  |
| ARG     | 10.2   | 1.5   | 1.9   | 1.4  | 0.8   |
| ASN     | 26.2   | 1.9   | 3.7   | 2.8  | 2.6   |
| ASP     | 12.4   | 1.4   | 2.8   | 0.1  | 1.9   |
| CYS     | 14.2   | 0.8   | 2.6   | 1.9  | 0.7   |
| GLU     | 11.1   | 1.7   | 2.5   | 1.4  | 1.3   |
| GLN     | 16.3   | 1     | 3.6   | 0.9  | 2     |
| GLY     | 158.3  | 11.3  | 20    | 9.6  | 15    |
| HIS     | 10.2   | 1.1   | 0.8   | 0.5  | 0.8   |
| ILE     | 136.9  | 8.1   | 21.6  | 9.7  | 14    |
| LEU     | 239.2  | 16.2  | 27.8  | 15.5 | 15.4  |
| LYS     | 6.5    | 1.4   | 1.9   | 0.8  | 0.5   |
| MET     | 48.2   | 3.2   | 6     | 4.5  | 5     |
| PHE     | 99.9   | 6.6   | 13.7  | 8    | 9.4   |
| PRO     | 38.3   | 2.5   | 4.9   | 2.8  | 4.2   |
| SER     | 68     | 3.5   | 11.3  | 5.7  | 8.3   |
| THR     | 76.3   | 4.9   | 10.8  | 8    | 6.1   |
| TRP     | 36.6   | 2.6   | 4     | 2.1  | 3.1   |
| TYR     | 40.9   | 4.9   | 4.8   | 3.6  | 2.8   |
| VAL     | 150.7  | 8.2   | 19.7  | 11.4 | 14.9  |
| LIP     | 1078.7 | 47.4  | 121.2 | 82.2 | 127.7 |
| SURFACE | 846.5  | 263.9 | 202   | 100  | 79.3  |

|         | GLU   | GLN   | GLY   | HIS  | ILE    |
|---------|-------|-------|-------|------|--------|
| ALA     | 11.1  | 16.3  | 158.3 | 10.2 | 136.9  |
| ARG     | 1.7   | 1     | 11.3  | 1.1  | 8.1    |
| ASN     | 2.5   | 3.6   | 20    | 0.8  | 21.6   |
| ASP     | 1.4   | 0.9   | 9.6   | 0.5  | 9.7    |
| CYS     | 1.3   | 2     | 15    | 0.8  | 14     |
| GLU     | 0.5   | 1.4   | 10.9  | 0.8  | 11.1   |
| GLN     | 1.4   | 1.4   | 12.4  | 0.2  | 11.8   |
| GLY     | 10.9  | 12.4  | 69.5  | 9    | 110.7  |
| HIS     | 0.8   | 0.2   | 9     | 0.6  | 5.5    |
| ILE     | 11.1  | 11.8  | 110.7 | 5.5  | 64.3   |
| LEU     | 14.9  | 18.3  | 199   | 8.4  | 165.3  |
| LYS     | 1.7   | 0.7   | 5.5   | 0.4  | 6.8    |
| MET     | 3.7   | 5.2   | 43.6  | 1.6  | 41.8   |
| PHE     | 6.5   | 7.9   | 82.8  | 4.5  | 88.9   |
| PRO     | 2.6   | 3.9   | 30.9  | 1.5  | 31.8   |
| SER     | 4.9   | 8.3   | 61.2  | 2.8  | 58.6   |
| THR     | 5.2   | 6.8   | 66    | 3.5  | 59.7   |
| TRP     | 2.6   | 2.6   | 26.9  | 2.6  | 29.1   |
| TYR     | 3.5   | 4.2   | 31.2  | 2.9  | 32.4   |
| VAL     | 10.2  | 10.8  | 125   | 7.8  | 122.6  |
| LIP     | 79.3  | 100.1 | 774.9 | 65.5 | 1038.8 |
| SURFACE | 111.5 | 146.1 | 690.2 | 35.6 | 908.2  |

|         | LEU    | LYS   | MET   | PHE   | PRO   |  |
|---------|--------|-------|-------|-------|-------|--|
| ALA     | 239.2  | 6.5   | 48.2  | 99.9  | 38.3  |  |
| ARG     | 16.2   | 1.4   | 3.2   | 6.6   | 2.5   |  |
| ASN     | 27.8   | 1.9   | 6     | 13.7  | 4.9   |  |
| ASP     | 15.5   | 0.8   | 4.5   | 8     | 2.8   |  |
| CYS     | 15.4   | 0.5   | 5     | 9.4   | 4.2   |  |
| GLU     | 14.9   | 1.7   | 3.7   | 6.5   | 2.6   |  |
| GLN     | 18.3   | 0.7   | 5.2   | 7.9   | 3.9   |  |
| GLY     | 199    | 5.5   | 43.6  | 82.8  | 30.9  |  |
| HIS     | 8.4    | 0.4   | 1.6   | 4.5   | 1.5   |  |
| ILE     | 165.3  | 6.8   | 41.8  | 88.9  | 31.8  |  |
| LEU     | 160.7  | 11.5  | 62.6  | 123.8 | 42.9  |  |
| LYS     | 11.5   | 0.4   | 2.4   | 5.4   | 2.1   |  |
| MET     | 62.6   | 2.4   | 7.8   | 31.4  | 9     |  |
| PHE     | 123.8  | 5.4   | 31.4  | 29.8  | 18.7  |  |
| PRO     | 42.9   | 2.1   | 9     | 18.7  | 3.3   |  |
| SER     | 75.2   | 3     | 19.6  | 43.6  | 15.6  |  |
| THR     | 89.5   | 4.6   | 23.3  | 44    | 18.1  |  |
| TRP     | 48     | 1.4   | 12.5  | 22    | 10.3  |  |
| TYR     | 49.6   | 2.4   | 10.7  | 22.7  | 8.6   |  |
| VAL     | 199.7  | 7     | 39.7  | 82.7  | 28.5  |  |
| LIP     | 1616.1 | 51.3  | 326.5 | 778.7 | 172.8 |  |
| SURFACE | 1348.2 | 164.7 | 325.8 | 716.8 | 261.9 |  |

  

|         | SER   | THR   | TRP   | TYR   | VAL    |  |
|---------|-------|-------|-------|-------|--------|--|
| ALA     | 68    | 76.3  | 36.6  | 40.9  | 150.7  |  |
| ARG     | 3.5   | 4.9   | 2.6   | 4.9   | 8.2    |  |
| ASN     | 11.3  | 10.8  | 4     | 4.8   | 19.7   |  |
| ASP     | 5.7   | 8     | 2.1   | 3.6   | 11.4   |  |
| CYS     | 8.3   | 6.1   | 3.1   | 2.8   | 14.9   |  |
| GLU     | 4.9   | 5.2   | 2.6   | 3.5   | 10.2   |  |
| GLN     | 8.3   | 6.8   | 2.6   | 4.2   | 10.8   |  |
| GLY     | 61.2  | 66    | 26.9  | 31.2  | 125    |  |
| HIS     | 2.8   | 3.5   | 2.6   | 2.9   | 7.8    |  |
| ILE     | 58.6  | 59.7  | 29.1  | 32.4  | 122.6  |  |
| LEU     | 75.2  | 89.5  | 48    | 49.6  | 199.7  |  |
| LYS     | 3     | 4.6   | 1.4   | 2.4   | 7      |  |
| MET     | 19.6  | 23.3  | 12.5  | 10.7  | 39.7   |  |
| PHE     | 43.6  | 44    | 22    | 22.7  | 82.7   |  |
| PRO     | 15.6  | 18.1  | 10.3  | 8.6   | 28.5   |  |
| SER     | 13.9  | 27.9  | 15.4  | 17.1  | 61.9   |  |
| THR     | 27.9  | 15.7  | 17.8  | 18.2  | 66.5   |  |
| TRP     | 15.4  | 17.8  | 5.5   | 8.9   | 31.6   |  |
| TYR     | 17.1  | 18.2  | 8.9   | 7.9   | 30.8   |  |
| VAL     | 61.9  | 66.5  | 31.6  | 30.8  | 64     |  |
| LIP     | 392.7 | 458.6 | 254.9 | 267.7 | 1020.4 |  |
| SURFACE | 390.2 | 418.9 | 302.8 | 404.7 | 869.1  |  |

Table S2: The neutral contact distribution for the 20 amino acids, lipid, and surface contacts.

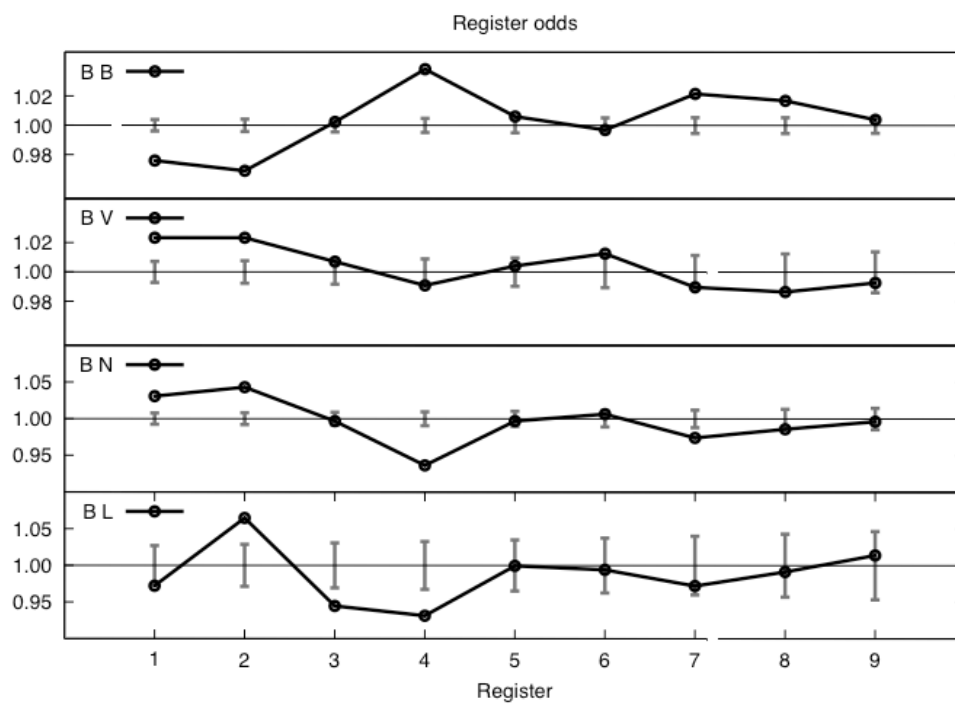

Figure S1. Register odds of the B/V/N/L breakdown, part 1. Ile/Val/Gly are included. Error bars show 95% confidence intervals.

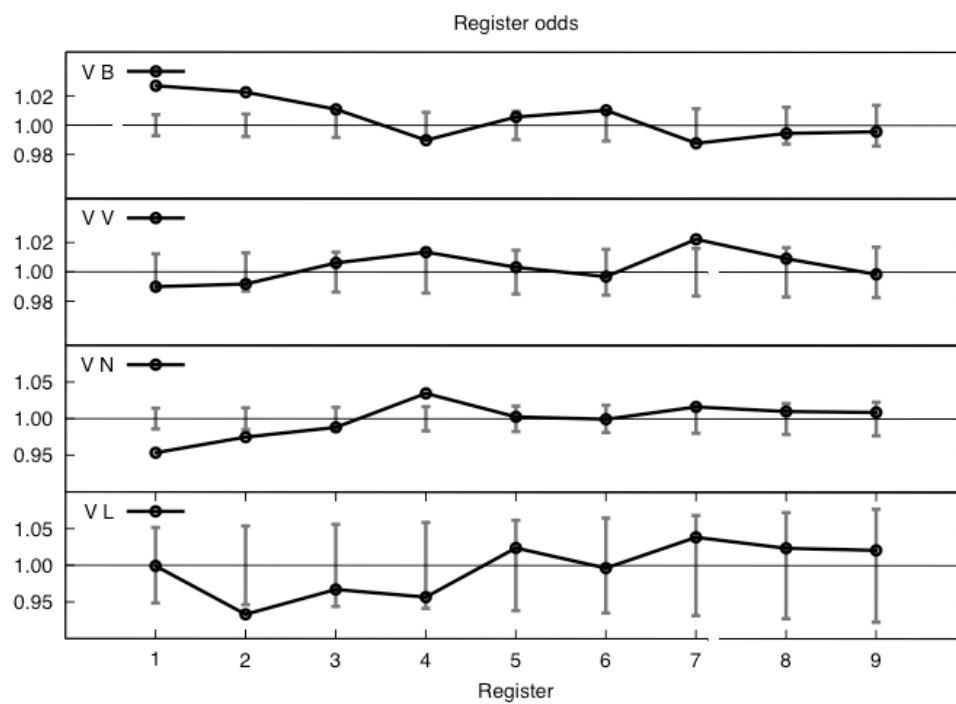

Figure S2. Register odds of the B/V/N/L breakdown, part 2. Ile/Val/Gly are included. Error bars show 95% confidence intervals.

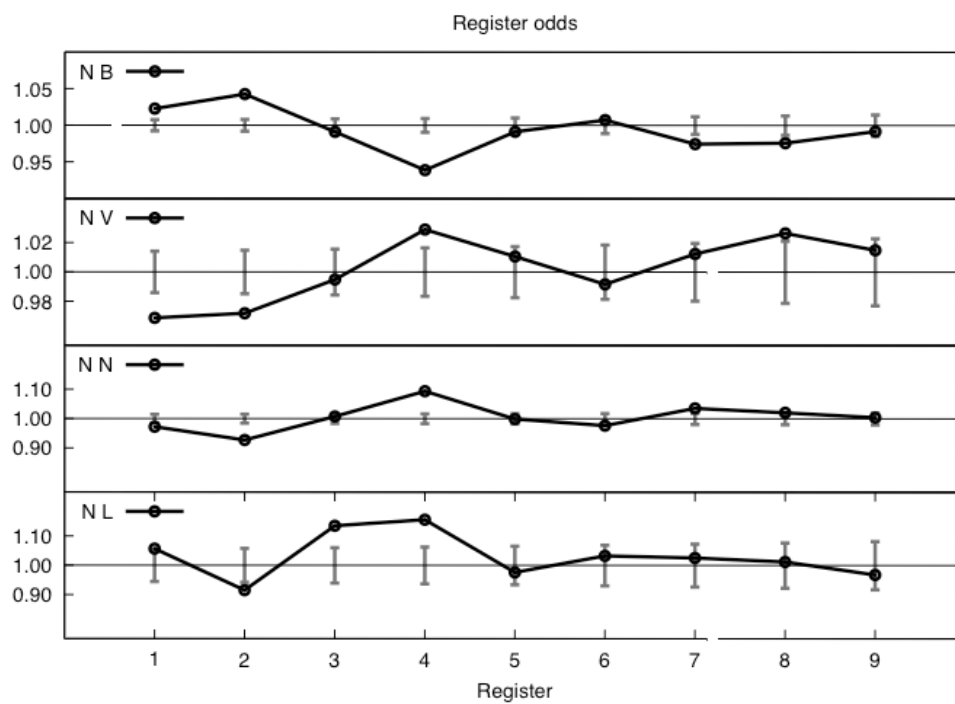

Figure S3. Register odds of the B/V/N/L breakdown, part 3. Ile/Val/Gly are included. Error bars show 95% confidence intervals.

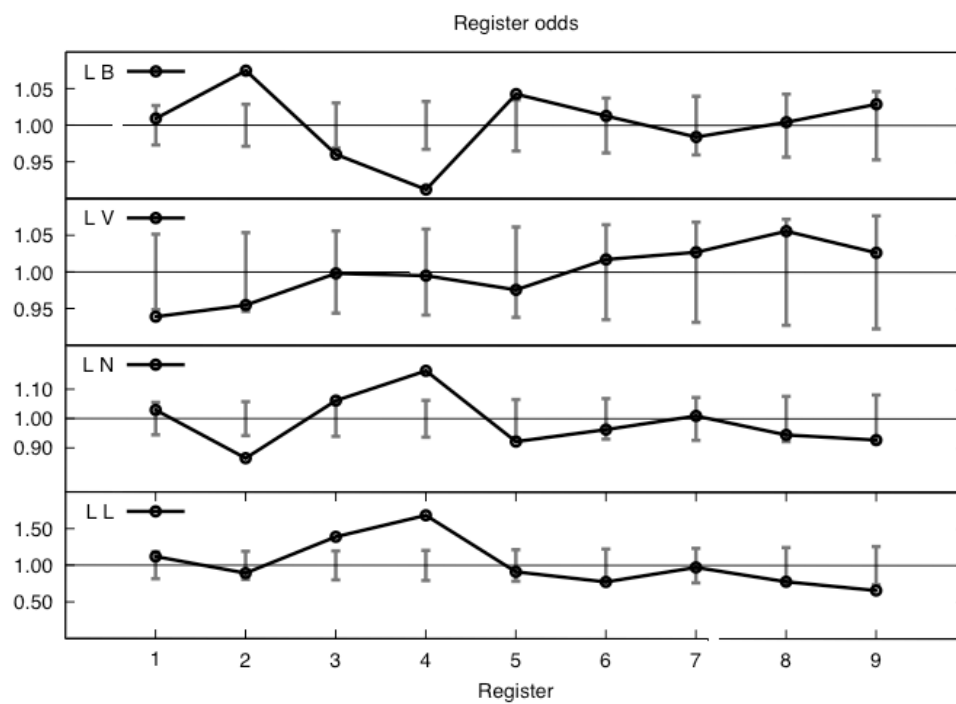

Figure S4. Register odds of the B/V/N/L breakdown, part 4. Ile/Val/Gly are included. Error bars show 95% confidence intervals.

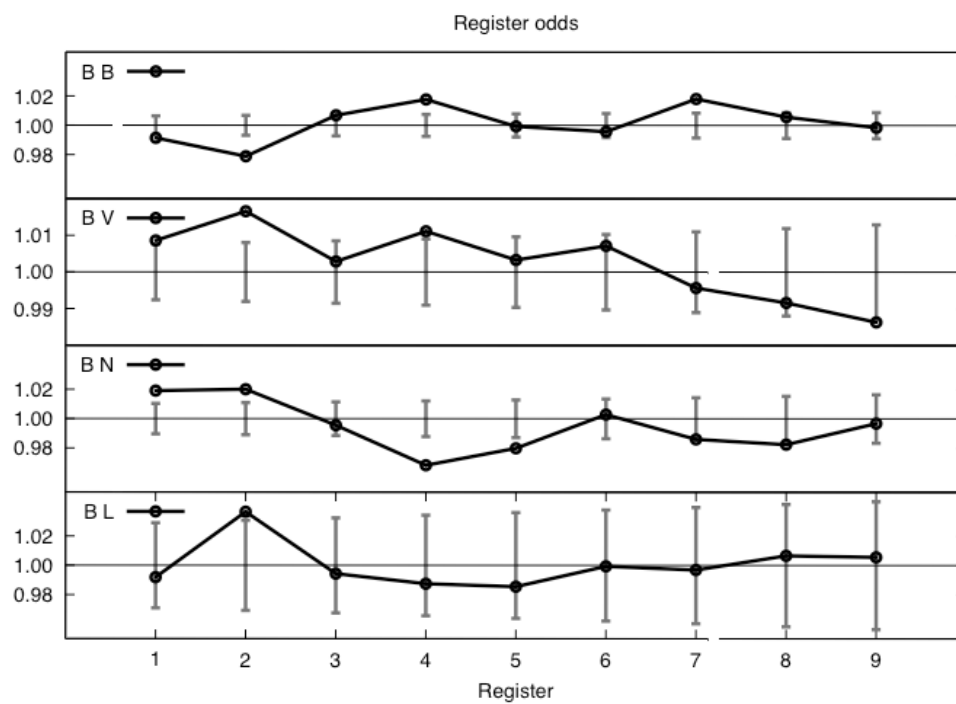

Figure S5. Register odds of the B/V/N/L breakdown, part 1. Ile/Val/Gly are not included. Error bars show 95% confidence intervals.

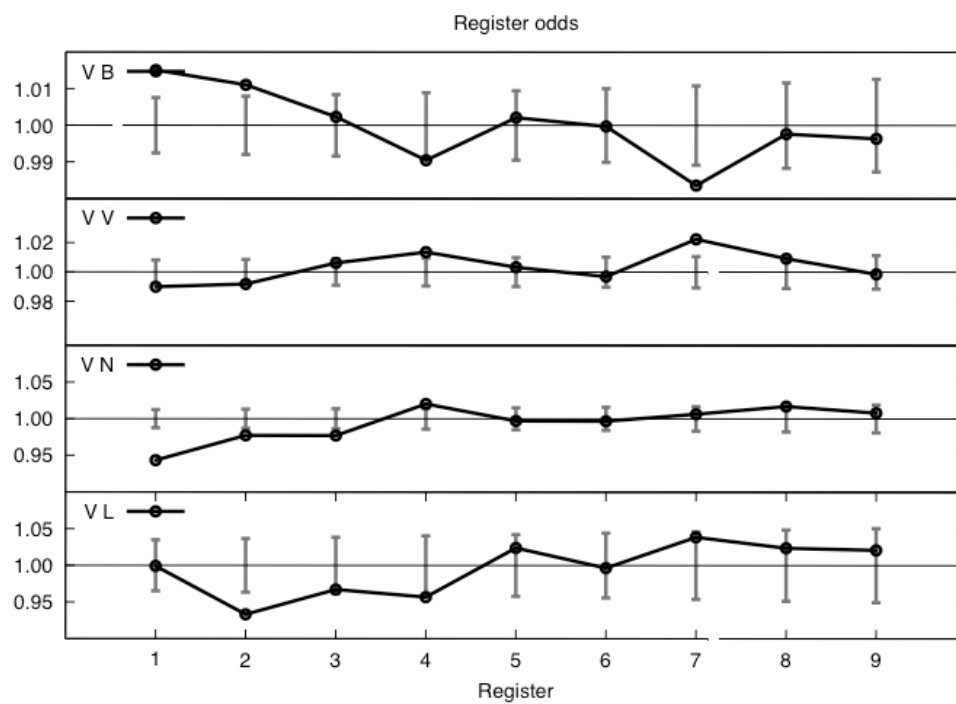

Figure S6. Register odds of the B/V/N/L breakdown, part 2. Ile/Val/Gly are not included. Error bars show 95% confidence intervals.

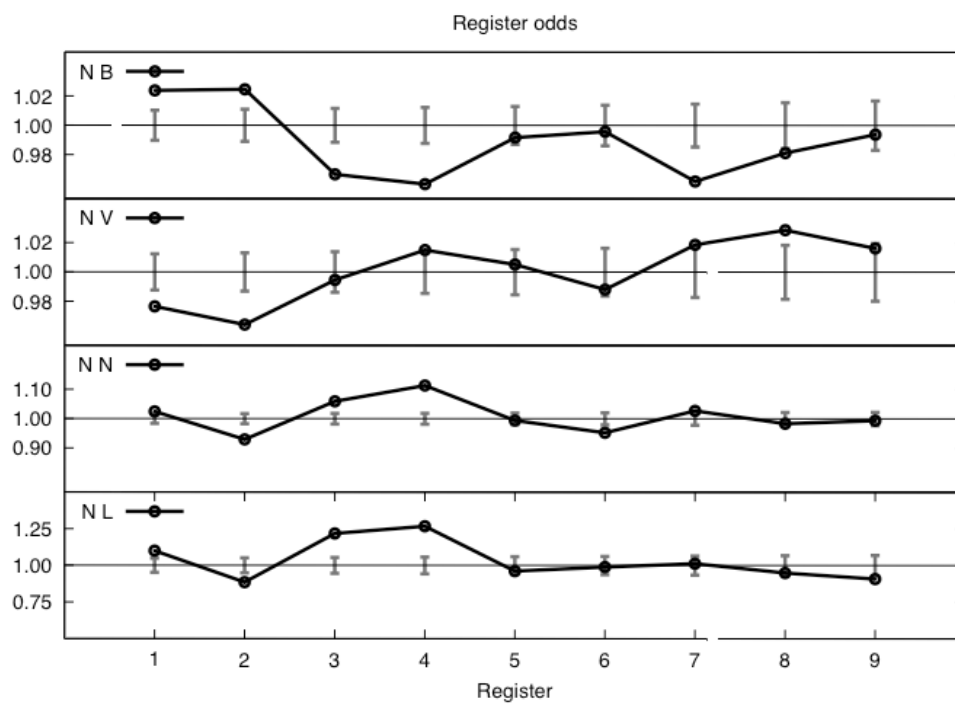

Figure S7. Register odds of the B/V/N/L breakdown, part 3. Ile/Val/Gly are not included. Error bars show 95% confidence intervals.

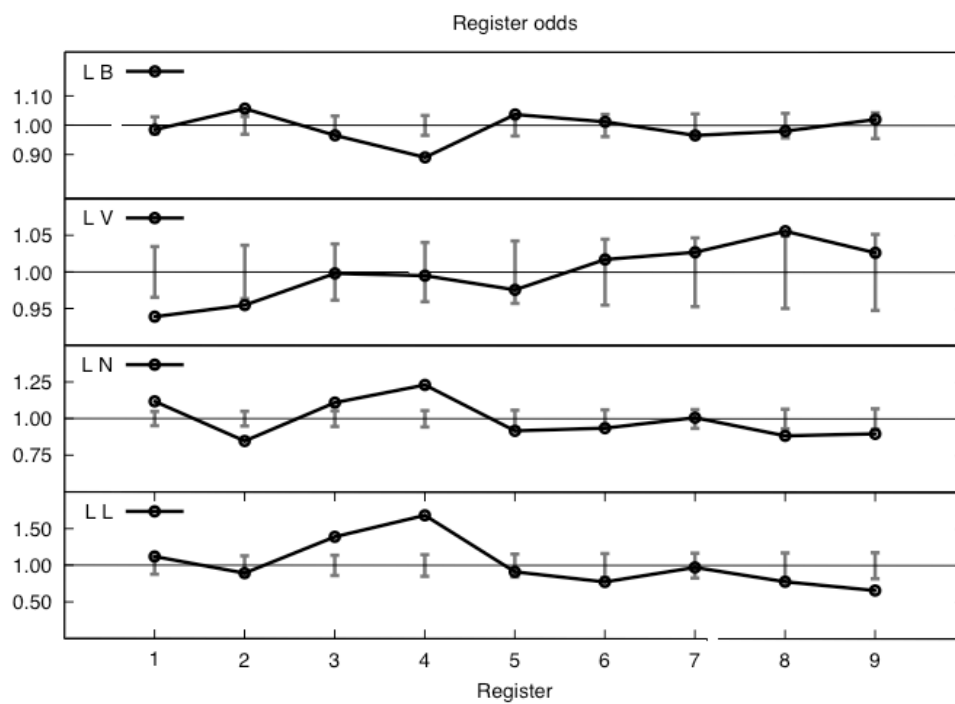

Figure S8. Register odds of the B/V/N/L breakdown, part 4. Ile/Val/Gly are not included. Error bars show 95% confidence intervals.

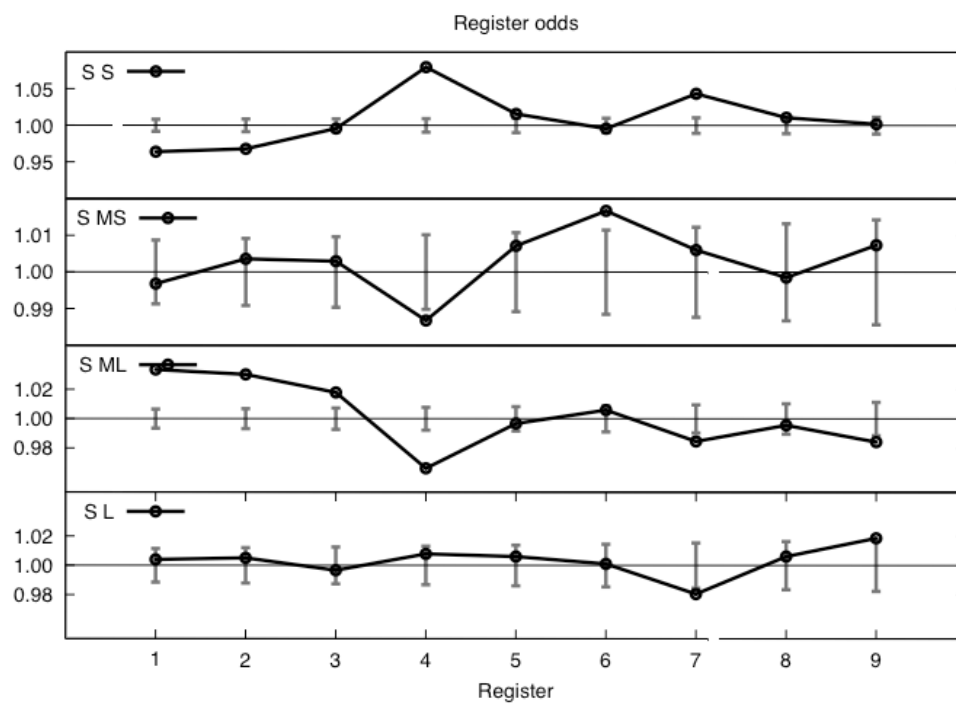

Figure S9. Register odds of the S/MS/ML/L breakdown, part 1. Ile/Val/Gly are included. Error bars show 95% confidence intervals.

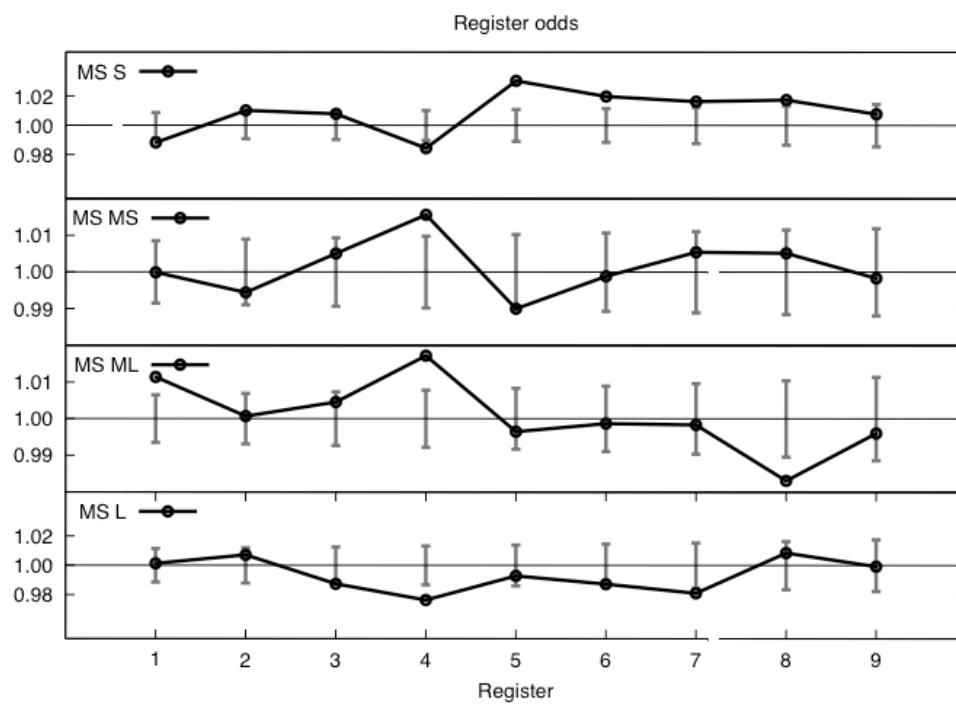

Figure S10. Register odds of the S/MS/ML/L breakdown, part 2. Ile/Val/Gly are included. Error bars show 95% confidence intervals.

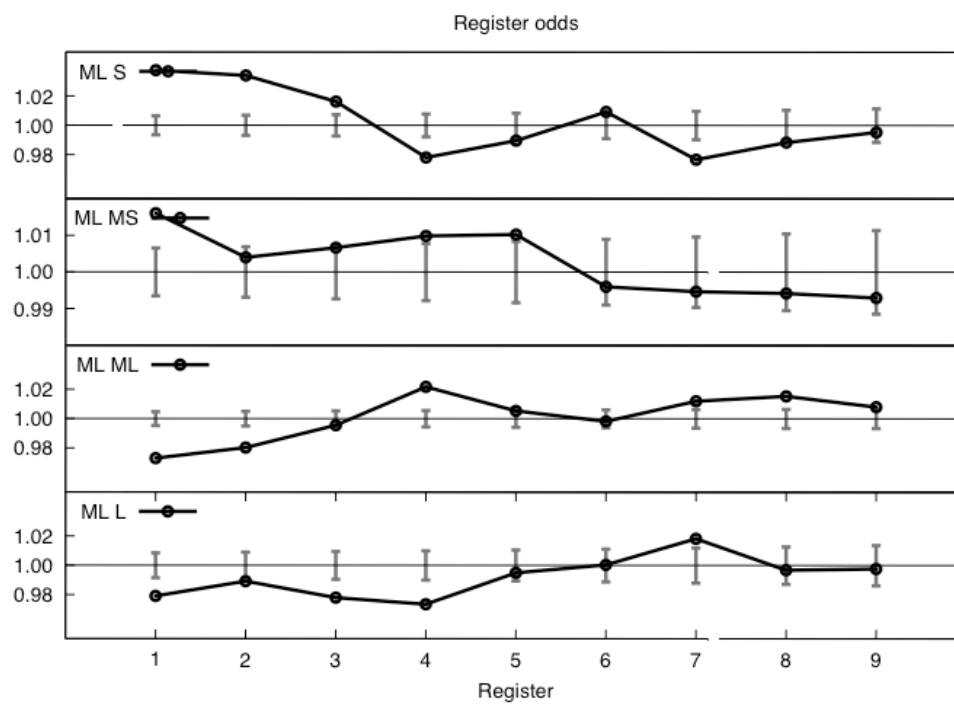

Figure S11. Register odds of the S/MS/ML/L breakdown, part 3. Ile/Val/Gly are included. Error bars show 95% confidence intervals.

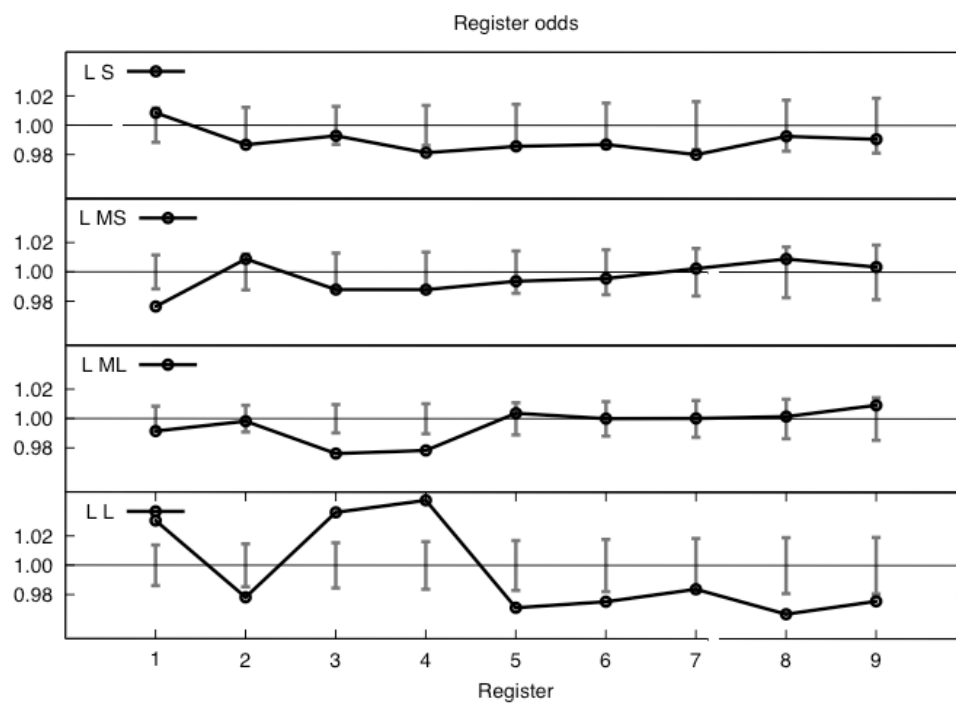

Figure S12. Register odds of the S/MS/ML/L breakdown, part 4. Ile/Val/Gly are included. Error bars show 95% confidence intervals.

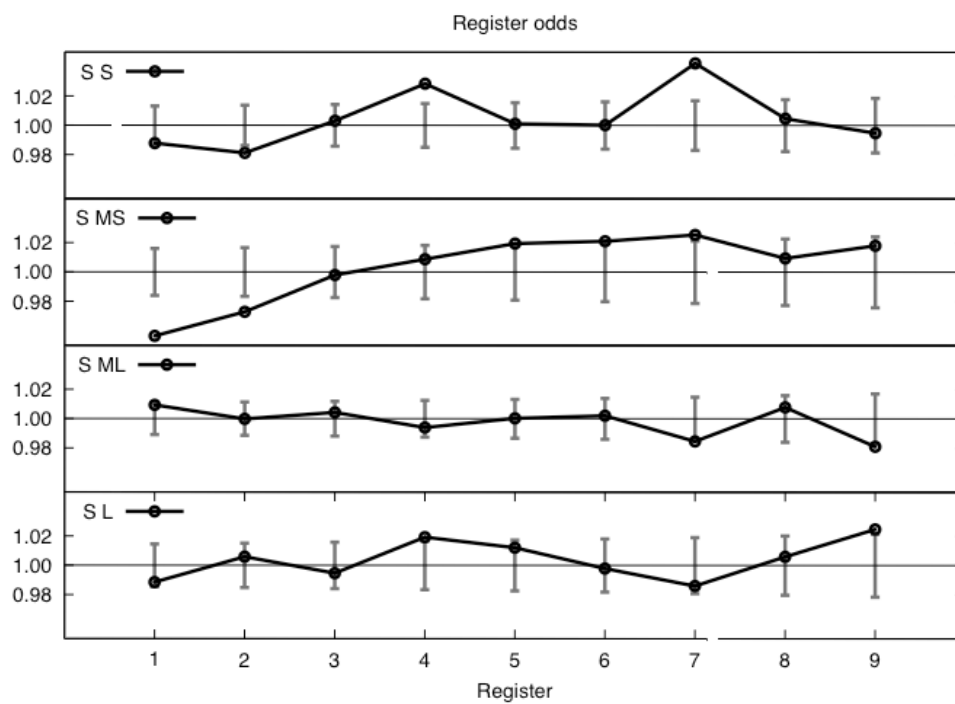

Figure S13. Register odds of the S/MS/ML/L breakdown, part 1. Ile/Val/Gly are not included. Error bars show 95% confidence intervals.

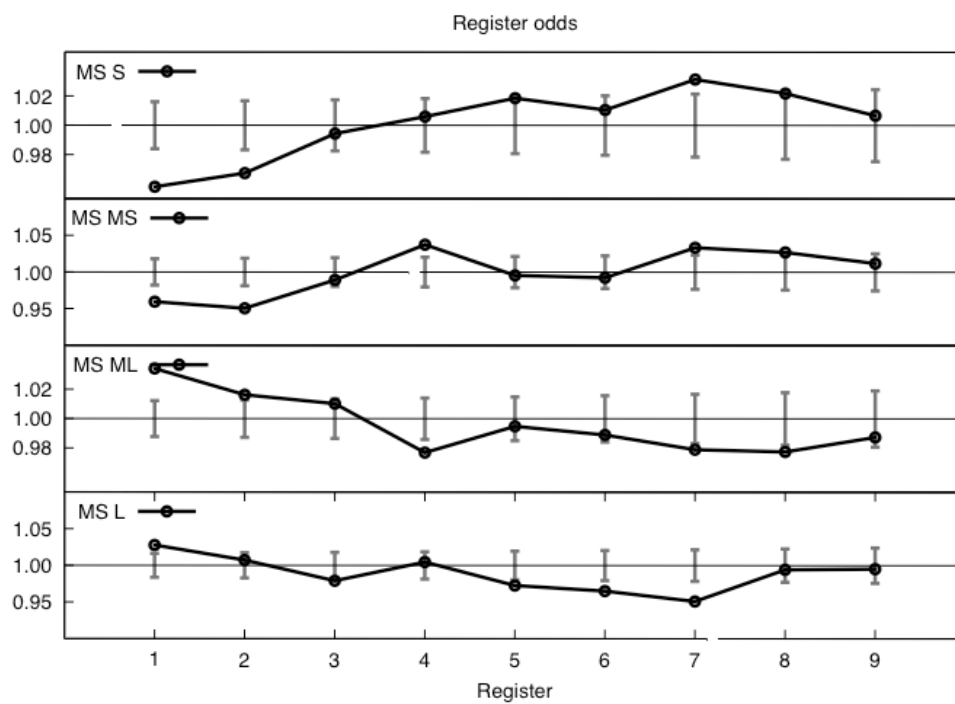

Figure S14. Register odds of the S/MS/ML/L breakdown, part 2. Ile/Val/Gly are not included. Error bars show 95% confidence intervals.

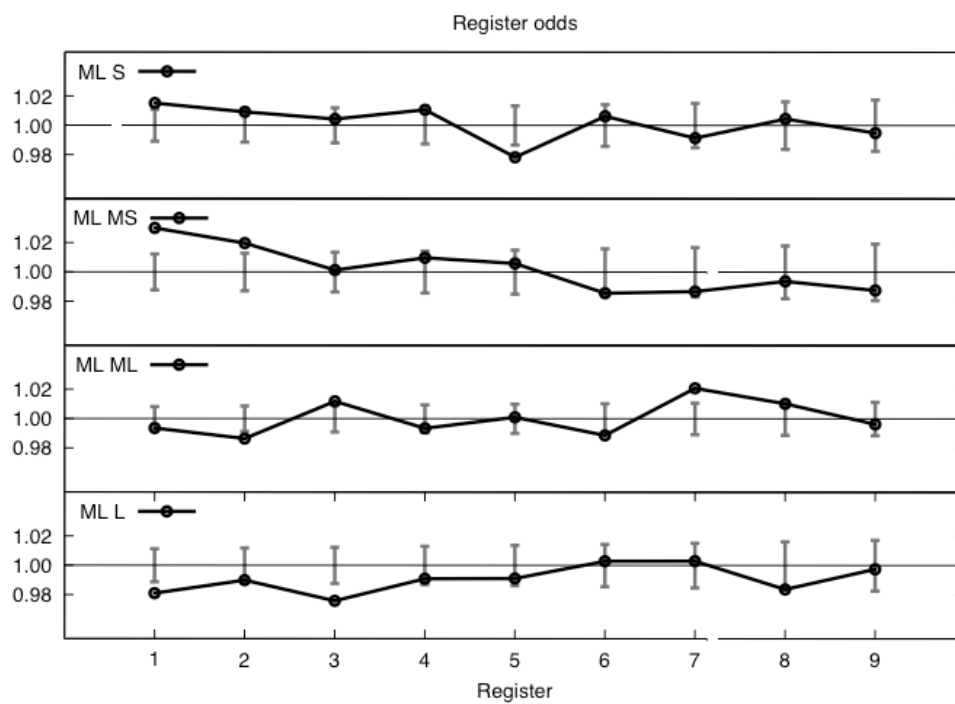

Figure S15. Register odds of the S/MS/ML/L breakdown, part 3. Ile/Val/Gly are not included. Error bars show 95% confidence intervals.

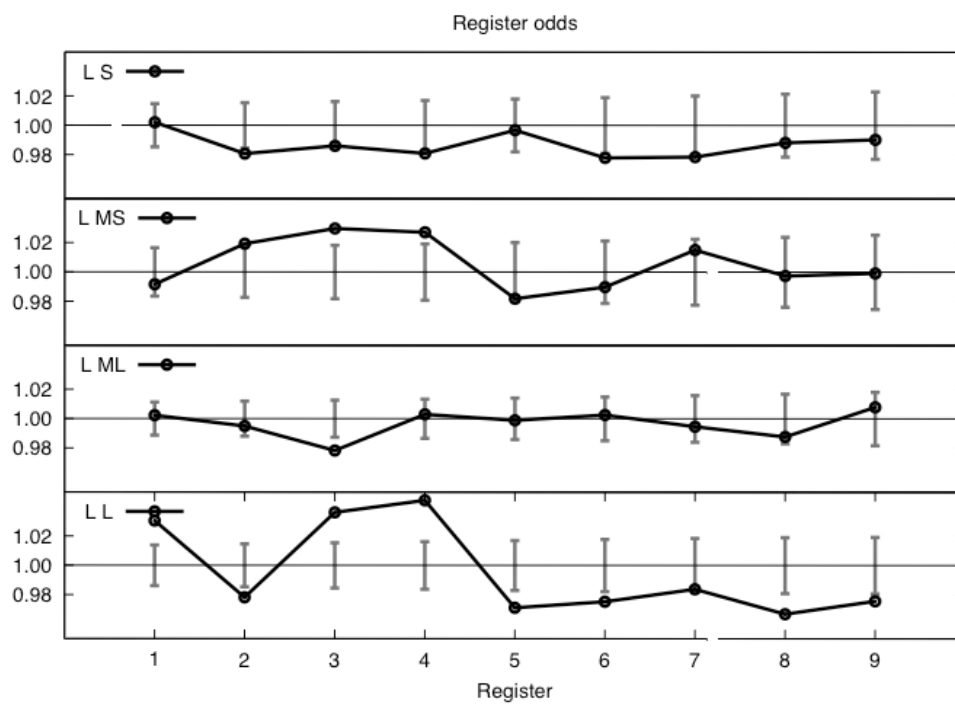

Figure S16. Register odds of the S/MS/ML/L breakdown, part 4. Ile/Val/Gly are not included. Error bars show 95% confidence intervals.

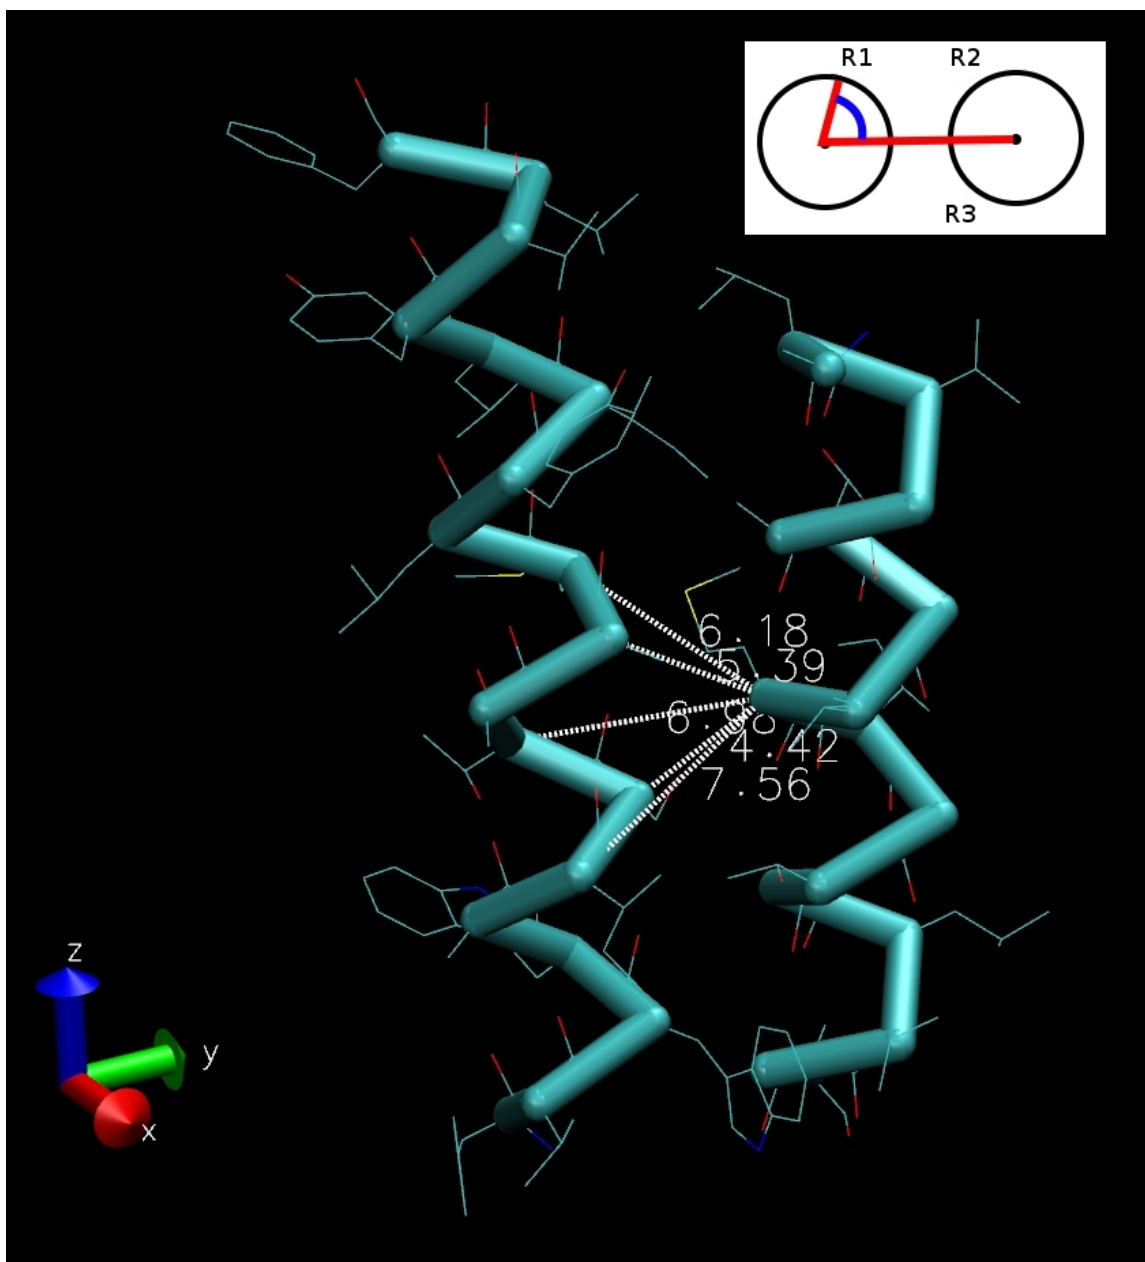

Figure S17. Shown above is an example of two interacting helices, with potential contacts within 7.75 Angstroms shown. Alpha carbons are shown in licorice and all atoms are shown in lines. The contacts labeled 6.98 and 7.56 are discarded based on an angle criterion described in the main text. The contact labeled 6.98 has angles 112.4 and -19.5, while the contact labeled 7.56 has angles -19.5 and -86.5. An angle of 112.4 is outside the 100 degree per-angle cutoff, while -19.5 and -86.5 sum to be greater than 100 degrees. The illustration was created with VMD (Humphrey, W., Dalke, A. and

Schulten, K., "VMD - Visual Molecular Dynamics", *J. Molec. Graphics*, 1996, **14** 33-38). See inset for an example of the angle computation.

Inset:

Inset is an example of the angle computation (angle section shown in blue). The circles represent helices looking down the bilayer normal, with alpha-carbons on the circle. Residues R1 and R2 are contacts based on the angle cutoff (they have opposite signs) whereas R1/R3 would not be a contact (they have the same sign, and so add to be greater than 100 degrees).
